# Supplementary material for: Paleogenomic insights into reduced gene flow between Felis species in Eastern Europe throughout the Holocene
Source: Research Square preprint supplement (doi:10.21203/rs.3.rs-7597455/v1), 2025-10-20
Supplement: Supplementary file 1 [file f9cc7c90319785f4fecd7b31.docx]

# **SUPPLEMENTARY INFORMATION**

**Paleogenomic insights into reduced gene flow between *Felis* species in Eastern Europe throughout the Holocene**

-authors

**This PDF file includes:**

Supplementary Information Text

Supplementary Figures S1 to S4

**Other supplementary materials for this manuscript include the following:**

Datasets S1 to S4

## Supplementary Information Text

## Archaeological context of samples

### Country: POLAND

**Deszczowa Cave**

N 50.588574, E 19.541117

Contact: Magdalena Krajcarz, Maciej T. Krajcarz

Deszczowa Cave (inv. No. J.Cz.III-06.24 in the Polish Cave Database) is located in Kraków–Częstochowa Upland, southern Poland. Its main chamber was excavated in 1989–1997, and the rear gallery in 2011–2012(Cyrek et al. 2020). The sedimentation in the main chamber occurred from the late Saalian to the beginning of the Eemian Interglacial (MIS 6 to MIS 5e, layers I, II, III, and IV), and, after an erosional hiatus, during MIS 3, MIS 2 (layers V, VI, VII, VIII, IX, X), and the Holocene (layers X and XI) (Cyrek et al. 2020). The sediments in the rear gallery represents MIS 3-MIS 2 (layers D, C, and B2) and the Holocene (layers B1 and A) (Krajcarz et al. 2015).

A few *Felis* remains were found at the site, both in the Pleistocene and Holocene layers. The studied specimen was found within natural layer B1, without archaeological context but mixed Holocene layers contained sparse archaeological material linked to Neolithic and early medieval occupations. Other mammals found within the same stratum included wild carnivorans, domestic ruminant, leporids, rodents, and insectivores (Krajcarz et al. 2015).

**Kałdus, site 3**

N 53.327018, E 18.38276

Contact: Daniel Makowiecki

Kałdus was one of the most important settlement centres in the Western Slavic region at the turn of the first and second millennia (Chudziak et al. 2016). The complex comprised a two-part stronghold (sites 3 and 6), surrounded by a suburban settlement and associated cemeteries (sites 1, 2, and 4). The beginning of the complex was dated to the tribal period, for the end of the 7th century. Over time, Kałdus developed into a major centre of pagan worship during the 9th and 10th centuries. By the late 10th century, it was incorporated into the Piast-ruled Polish state, attaining a high political and social status as sedes regni principales (a principal seat of the kingdom). In the early 13th century, the site came under the ownership of the Teutonic Order. The studied bone was recovered from the area of the Basilica complex (trench 7, layer 3), which has been dated to the late 11th or early 12th century.

**Kazimierza Wielka, site 13**

N 50.269229, E 20.478845

Contact: Jarosław Wilczyński

In terms of physiogeography, the site in Kazimierza Wielka is located on the Proszowice Plateau (western part of the Małopolska Upland) but the site itself is located above a small erosional outcrop, at the side of the Nidzica valley. Archaeological investigations were carried out at the site between 2019 and 2021 as a part of a rescue excavation (Czerniak R., Fudali T., and G. 2024). Several phases of human activity were identified, spanning from the Early Neolithic to the Early Bronze Age. Notably, twelve features associated with the Mierzanowice culture of the Early Bronze Age were uncovered. These consisted primarily of deep utility pits with trapezoidal vertical cross-sections and distinctive stratified backfills. Artefacts recovered from these features can be attributed to the proto- and early phases of the Mierzanowice culture (2,300–2,050 BCE (Jarosz 2024)).

Feature 34, where the remains of a wildcat were uncovered, contained ceramic artefacts characteristic of the early phase of the Mierzanowice culture (Wilczyński J., Pospuła S., and K. 2024). The feature contained 80 animals’ bones and teeth, representing both wild and domestic species. The wildcat skeleton was nearly complete and belonged to a few months’ old individual – the lower jaw still has deciduous teeth, and the proximal and distal epiphyses of long bones were not yet fused.

**Kroczycka Cave**

N 50.58732, E 19.539965

Contact: Jarosław Wilczyński

Kroczycka Cave (actually known as Żurowski Cave, inv. No. J.Cz.III-06.23 in the Polish Cave Database) is located in the village of Kostkowice, Silesian voivodship, and was accidentally discovered in 1936 during calcite extraction. Human remains belonging to a group of approximately 40 individuals were found lying on the surface around four hearths, accompanied by Roman Period artefacts. The wildcat remains analysed in this study were found during recent excavations that began in 2014. These investigations yielded additional hand-made pottery fragments, numerous spindle whorls, an amber bead, and loose human bones. A small pit attributed to the Przeworsk culture was also documented. In total, 688 animal bone and tooth fragments were recovered, most of which were highly fragmented what made difficult taxonomic determination. Among the identifiable specimens, domestic mammals predominated. The assemblage also included seven cat (*Felis* sp.) remains: two humeri (one complete, one distal fragment), a fragment of the pelvis, a tibia, two metatarsal bones, and a phalanx.

**Miechów, site 3**

N 50.356488, E 20.027885

Contact: Jarosław Wilczyński

The site at Miechów is located in the Lesser Poland Voivodeship, within the urban-rural commune of Miechów, near the Miechówka stream. Rescue excavations were carried out between 2011 and 2016. Miechów site 3 represents an extensive, multicultural settlement with rich archaeological remains spanning from the Early Neolithic and Eneolithic through the Bronze Age, the Roman Period, and into the early Middle Ages (Moskal-del Hoyo et al. 2017). The site was most intensively occupied during the Lublin-Volhynian culture, when a large fortified settlement, enclosed by a ditch and palisade, was established.

Wildcat remains were recovered from feature 1374, which contained pottery and flint artefacts characteristic of the Lublin-Volhynian culture settlement. A total of 121 animal remains were discovered, primarily bones and teeth of domestic species and isolated remains of wild mammals. The wildcat mandible belonged to a mature individual.

**Perspektywiczna Cave**

N 50.442602, E 19.766957

Contact: Magdalena Krajcarz, Maciej T. Krajcarz

Perspektywiczna Cave (inv. No. J.Cz.IV-04.117 in the Polish Cave Database) is located in Udorka Valley, in the middle part of Kraków-Częstochowa Upland, southern Poland. It has been discovered in 2011, and excavated since 2012 (Sudoł et al. 2016; Krajcarz, Pacher, et al. 2016; Krajcarz, Krajcarz, et al. 2020; Krajcarz et al. 2023). The cave includes two chambers connected by a gallery. Two entrances to the cave occur in a cliff at an elevation of 340 and 345 m a.s.l. The upper chamber is filled with Holocene series (layer C1), disturbed by animal burrowing, and gray and yellowish-brown loamy sands with limestone debris (layers C2 and C3) dated to MIS 3 on the basis of a rich series of radiocarbon dates of cave bear and cave hyena remains (Krajcarz, Makowiecki, et al. 2016; Krajcarz et al. 2023). The lower chamber contains Upper Pleistocene and Holocene sediments with abundant animal bones and archaeological material. During the excavations, nineteen archaeological layers were identified within a 4-m-thick sequence. The sediments of the lower chamber are dated to: the Late Glacial of the Last Glaciation (layers 9a, 9b), Lower Holocene (layer 8), and Middle to Upper Holocene (all other layers, including the colluvial series of re-deposited LGM to Middle Holocene material). This is a colluvium situated between the Late Glacial and Lower Holocene series, composed of material dated to MIS 3 and re-deposited from the upper chamber (Krajcarz et al. 2023). Chronology of the lowest strata (layers 10, 11 and 12) is unknown.

The studied specimens were discovered in the Upper Holocene layer 4, without archaeological context.

**Południowa Cave**

N 50.93137, E 15.91214

Contact: Adrian Marciszak

Południowa Cave (620 m a.s.l.; inv. no. S-5.24 in the Polish Cave Database, German names: Kitzelhöhle, Kitzelloch, Kitzelberghöhle, Kitzelkirche, Teufelskeller) is one of the most significant sites in the Sudetes Mountains. The cave forms an elongated, L-shaped corridor and has been known for over 500 years. It was rediscovered during quarrying activities, with initial investigations conducted in 1904, followed by more extensive excavations in the 1930s. The cave was destroyed in the 1970s. The stratigraphic sequences comprise: yellow clays, intercalations of quartz gravels, red clays of terra-rossa type, and limestones debris covered by brown clays. The oldest faunal element is dated to Pliocene while the younger assemblage is dated back to the Late Pleistocene (MIS 3 and MIS1) (Marciszak et al. 2024; Marciszak, Gornig, and Stefaniak 2017).

**Raj Cave**

N 50.82529, E 20.494297

Contact: Jarosław Wilczyński

The Raj Cave (inv. No. G-2.17 in the Polish Cave Database) is located in Chęciny, on the slope of the Malik Mountain in the Bolechowice Range, southern-central Poland. It was discovered at the end of 1963 during stone extractions. The paleontological and archaeological material comes from research conducted here in 1967–1972 (Kowalski K., Kozłowski J.K., and T. 1972).

The studied wildcat mandible was recovered during excavations conducted within the cave interior. The absence of post-Upper Palaeolithic cultural layers suggests that the cave entrance was closed since the end of the Pleistocene or the Early Holocene, precluding later human occupation. As such, the wildcat remains represent a natural deposit and are not associated with anthropogenic activity.

**Shelter in Smoleń III**

N 50.433976, E 19.673964

Contact: Magdalena Krajcarz, Maciej T. Krajcarz

Shelter in Smoleń III (inv. No. J.Cz.IV-04.44 in the Polish Cave Database) is situated in Wodąca Valley, in the middle part of Kraków-Częstochowa Upland, southern Poland. Two entrances to the cave, exposed to NE direction, are located at 345 m a.s.l in the south-eastern part of a limestone hill. The excavations were conducted in 2012-2013 and revealed the presence of long stratigraphic series of sediments rich in animal bones and traces of human activity (Krajcarz, Krajcarz, et al. 2020; Sudoł et al. 2015; Sudoł et al. 2016). The near-entrance area and partially the sediments inside the shelter were excavated. The sequence of sediments has a relatively large thickness (up to 250 cm) and is composed of 12 lithologically variable layers. The major part was deposited continuously since around 12,000 years BCE until the modern times (Krajcarz, Szymanek, et al. 2020). The studied specimens were discovered in the natural layers 2 and 4, without archaeological context.

**Shelter in Udorka Valley I**

N 50.442833, E 19.767194

Contact: Magdalena Krajcarz, Maciej T. Krajcarz

Shelter in Udorka Valley I (inv. No. J.Cz.IV-04.118 in the Polish Cave Database) is located a few dozen meters away from Perspektywiczna Cave, on the same right slope of the Udorka Valley, and likely belongs to the same ancient karst system. The interior of the rock shelter is weakly accessible due to sediments that fills the rock shelter nearly entirely. Excavations at the site conducted in 2013 and 2018 covered approx. 11 sq. m around the southern entrance and partially inside the shelter. The stratigraphic sequence comprises Holocene sediments, strongly disturbed by slope processes, as well as human and animal activity. Two sedimentary series can be distinguished: an older series of primarily natural sediments (layers 5, 4, 3, and 2c) characterized by yellow-brown silty loams rich in limestone debris, and a younger series of anthropogenic origin. Archaeological materials within the older series are sparse but include three hearths, the uppermost of which yielded a radiocarbon age of 6400–6300 cal. years BP, corresponding to the Middle Neolithic, likely associated with the Lengyel-Polgar cultures. The older hearths remain undated. Single human bones and teeth were found in the sediments. One of the bones was radiocarbon dated to 4200-4000 cal. years BP, which refers to the Mierzanowician, the early Bronze Age cultural unit. The analyzed specimen was discovered in the layer 3.

**Solna Jama Cave**

N 50.189471, E 16.605693

Contact: Adrian Marciszak

Solna Jama Cave (585 m a. s. l., inv. No. S.II-02.01 in the Polish Cave Database) is a 50-m-long cave in the Sudetes Mountains, southwestern Poland. It features a single entrance leading to a large oval chamber, with several adjoining shallow niches and corridors. Small karst springs flow through the cave system. When the largest chamber was discovered in 1985, its floor was flooded. Above the cave, a karstic breccia containing animal remains was uncovered within a fissure, suggesting the presence of an additional, previously unknown sedimentary horizon above the known deposits. The cave has been known for over 300 years. Paleontological investigations conducted in 1985–1986 revealed sediments composed of loams with debris and humus. The oldest faunal element is *Ursus spelaeus ingressus*, which likely dates to MIS 3. All other faunal remains recovered are younger than 13,000 years BCE (Marciszak, Gornig, and Stefaniak 2017).

**Starogród**

N 53.309267, E18.374776

Contact: Daniel Makowiecki

The studied specimen was found in the area of the medieval town founded by the Teutonic Knights, in Trench 7th, nearby the relics of a building. The time of deposition determined since around AD 1230s–1245 to the post-Medieval times, based on archaeological criteria. The radiocarbon dating of the cat bone indicates that the specimen is related to times preceding the town foundation (Wasik 2020; Makowiecki, M., and Wiejacka 2020).

**Żarska Cave**

N 50.164458, E 19.703295

Contact: Jarosław Wilczyński

Żarska Cave (inv. No. J.Olk.I-09.08 in the Polish Cave Database) is situated in the Żarski Gorge, approximately 20 km northwest of Kraków. The gorge is a dry tributary of the Racławka Valley, one of several deeply entrenched valleys draining the south part of the Kraków-Częstochowa Upland. The research in Żarska Cave was conducted in 2011, 2012 and 2014, and revealed a well-preserved, multilayered sequence of Holocene sediments, an exceptionally rare record in the Carpathian forelands (Wojenka M., Wilczyński J., and A. 2016; Wilczynski et al. 2020).

The *Felis* femur analysed in this study comes from the archaeologically sterile Upper Holocene layer 4/5, which lies stratigraphically between two archaeologically rich horizons: below layer 6, containing abundant Eneolithic Baden culture and Eneolithic/early Bronze Age Strzyżów culture artefacts; and the topsoil-like silty to sandy loams of layers 1 and 2, which include redeposited material from the Late Roman/Early Migration Period (Przeworsk culture, including two human skeletons), as well as Medieval and Modern periods (Wojenka M., Wilczyński J., and A. 2016).

**Żółte, site 33**

N 53.58306, E 15.822221

Contact: Daniel Makowiecki

The island of Żółte, located on Lake Zarańsko in Western Pomerania, served as important socio-political and religious centre from the late 9th to the early 12th century (Chudziak and Kaźmierczak 2014). Skeletons and skulls of domestic mammals (including horses) have been discovered on and around the island.

A cat skeleton was found within the layer of the oldest phase (Ic) of settlement, positioned near an erratic granitoid boulder (measuring approximately 1.7 × 0.9 × 0.8 m), which likely served as an altar. Archaeological context dates the deposition to the late 10th century through the 10th–11th century. The skeleton comprised a skull, both mandibles, fore- and hindlimb bones, ribs, the first cervical vertebra, and three thoracic vertebrae. Near-complete ossification of the bone epiphyses indicates the individual was approximately 11.5 months old at death. No evidence of human modification was observed on the bones, and the nearly complete anatomical composition suggests the entire animal was deposited intact (Makowiecki and Makowiecka 2014).

### COUNTRY: SERBIA

**Bubanj**

N 43.32, E 21.829

Contact:Jelena Bulatović

The site of Bubanj – Novo Selo is located on a lower river terrace, near the confluence of the Nišava and the Južna Morava rivers, 5 km west of Niš, southeastern Serbia. Bubanj is the eponymous site of the central Balkan Eneolithic cultural traditions and is of great importance for the understanding of the development of prehistoric Metal Age societies in the region (Tasić 1979; Trajković-Filipović, Milanović, and Bulatović 2008). The multilayered site preserves up to 3.5 m of cultural deposits, spanning approximately 5,000 years. It was assumed that site originally covered about 5 ha, much of the site was destroyed by 20th-century construction, leaving only a 200 m² area intact. This preserved section was fully excavated between 2008 and 2014 (Bulatović and Milanović 2012, 2014; Bulatović and Milanović 2020). During these excavations, a large amount of animal remains (around 20,000 fragments) were hand collected and subsequently analysed. The majority of animal remains were collected from cultural layers, with a smaller number coming from various types of well-defined archaeological features such as: pits, houses, kilns, post-holes, ditches, etc. (Bulatović 2020). Based on the stylistic-typological characteristics of pottery and vertical stratigraphic sequence, the features and layers were grouped and dated to five stratigraphic layers (phases): I – the Early/Middle Neolithic, II – the Early Eneolithic, III – the Middle Eneolithic, IV – the Late Eneolithic, and V – the Late Eneolithic/Early Bronze Age. The faunal assemblages represent typical settlement food waste, as indicated by body part distributions and butchery mark patterns.

In the layer (phase) V, six bones of a wildcat from the Late Eneolithic/Early Bronze Age were found. Five bones, representing a minimum of two individuals, were found in a single cultural layer (Trench III, squares Is17e and Is16e, spit 22). Among these, fragments of one tibia and two humeri with fused epiphyses likely belonged to an adult wildcat, while two fragmented tibiae with unfused distal epiphyses came from a juvenile under nine months old. A sixth bone, a left femur fragment with a fused proximal epiphysis from an adult wildcat (BU 13/290/1), was recovered from a separate cultural layer (Trench III, square In22e, spit 15) and was analysed in this study. No butchery marks were found on any of these wildcat bones.

**Caričin Grad**

N 42.57127 E 21.40085

Contact**:** Nemanja Marković

The archaeological site of Caričin Grad is located in southern Serbia on the eastern slopes of Mount Radan, approximately 30 km southwest of Leskovac. The site’s ruins are identified as *Justiniana Prima*, a city founded by Emperor Justinian I (527–565) as stated in *Novella* 11, erected to serve as the residence of an archbishop and the Praetorian prefect of Illyricum. As a result, the excavations at Caričin Grad provide invaluable, well-preserved evidence of a small city from the 6th and early 7th centuries, located in an unusual and remote area: far from the major settlement hubs along the Danube and other navigable rivers. Situated in the rural western region of the province Dacia Mediterranea, the city represents the later phases of urban development in northern Illyricum. The city featured robust fortifications, sophisticated water supply systems, many churches, administrative and public buildings, wide porticos, squares, and residential quarters (Ivanišević 2016; Kondić and Popović 1977). Large number of animal bones were recorded from three areas: the towers of the Acropolis, Upper Town, and Lower Town. Mammal remains were dominant in all three assemblages. Domestic species accounted for over 95% of the NISP, indicating that livestock provided the primary and most reliable source of meat. Hunting appears to have been opportunistic and played a minor role in the subsistence economy (Baron, Reuter, and Marković 2019; Marković and Baron 2022; Marković, Reuter, and Birk 2019).

Cat remains were recovered from all three sectors, comprising 0.5% of the total NISP from Caričin Grad. The specimen analysed in this study is a fragment of the right mandible of an adult individual, with the second and third premolars and the first molar preserved. The teeth show no signs of wear. The sample was recovered from the Sector Q in the Lower Town, within the embankment layer along the inner side of the western ramparts. Stratigraphic contexts date the specimen to second half of the 6th century.

**Gamzigrad**

N 43.899244, E 22.186114

Contact:Mladen Mladenović, Stefan Pop-Lazić

The Gamzigrad–*Felix Romuliana* archaeological site is situated in the Crna Reka valley in eastern Serbia, near the Zaječar. The area’s distinctive topography is shaped by hills composed of volcanic deposits. Strategically located, the Crna Reka valley forms a natural corridor linked to two major Mediterranean trade routes traversing the central Balkan Peninsula (Živić 2011).

Multiple cultural layers have been identified at Gamzigrad–*Felix Romuliana*, which is best known for the palatial complex constructed by Emperor Galerius and finished by 305 AD as a monumental rampart with massive towers (Petković 2010). An analysis of faunal remains from Tower 15, based on the relative distribution of species, age categories, and butchery mark patterns, suggests that most of these remains were associated with consumption activities (Mladenović and Pop-Lazić 2023).

The cat remains analyzed in this study were recovered from the vicinity of Tower 15, part of the later phase of fortification. These remains were hand-collected during archaeological excavations conducted in 2012–2013. Tower 15, located at the southwestern corner of the fortified palace, is characterized by a polygonal exterior and a circular interior. Stratigraphic analyses have distinguished discrete occupation layers corresponding to the Late Antique and Early Byzantine periods.

**Padina**

N 44.607289, E 22.000911

Contact: Ivana Živaljević, Vesna Dimitrijević

The Padina site is located in the eastern Serbia, within the second of four narrow gorges carved by the Danube River through the southern part of the Carpathian Mountains. It encompasses four interconnected river terraces (sectors), sloping towards the Danube. The archaeological excavations conducted between 1968 and 1970 uncovered the evidence of occupation spanning the Mesolithic, Neolithic, Eneolithic, and the Iron Age, with occasional finds from the Roman and Medieval period (Jovanović 1969, 2008). The earliest traces of human presence are associated with the Early Holocene hunter-fisher-gatherer communities, sporadically inhabiting the locale over the course of several millennia. Material remains from the Early Mesolithic (c. 9,500‒7,400 cal BC) include circular and elongated stone constructions, burials, as well as chipped stone and bone tools, charred wood fragments, and animal (mainly wild mammal) bones. Late Mesolithic evidence (c. 7,400‒6,300/6,200 cal BC) consists of stone-lined hearths, stone constructions, sporadic burials, chipped stone, bone and antler tools, and caches of animal bones indicating a greater role of fish in the diet during this phase (Borić 2011; Živaljević 2017; Jovanović 2008). Around 6,300/6,200 cal BC, a more complex settlement emerged, characterized by trapezoidal-base buildings with clay floors and stone-lined hearths. This period coincides with the emergence of the first farming (Neolithic) communities in the region, bringing new practices and material culture, such as pottery, polished stone axes, Balkan yellow-spotted flint, and oven models. Despite these innovations, the settlement layout, architectural forms, and sculpted sandstone boulders reflect a distinctively local cultural tradition. The continuity of Mesolithic lifeways is also evident in the toolkits and faunal assemblages from the trapezoidal buildings, which primarily include fish, wild game, and dog remains. This phase, marked by the trapezoidal structures at Padina and the neighboring site of Lepenski Vir, is identified as the Transitional or Transformational Mesolithic–Neolithic phase (Borić 2011).

Wildcat remains were few, comprising of nine identified specimens (0.5% of the mammal faunal assemblage) (Clason 1980). Similarly to other fur bearing animals, wildcats may have been hunted for their fur, though their meat could also have been consumed. The humerus analysed in this study was found (along with other wildcat remains from Building 7), within the dark earth mixed with fish bones and traces of burning. Based on their ageing and the skeletal element distribution, some of the wildcat remains from Building 7 could have originated from the same animal. The suture of the distal part of the analysed humerus was fused, which in domestic cats takes place at the age of 8.5 months. On the distal part of the radius the suture was open, and it closes at approximately 11.5 months in domestic cats. On the femur, the suture of the trochanter major was still open, and it closes at approximately 8.5 months. This suggest that the animal was between 8.5 and 9 months old. Notably, none of the wildcat remains showed evidence of taphonomic modifications, such as skinning or butchery marks. However, the building’s infill contained a large number of fish bones, which likely represent food waste.

**Pešturina**

N 43.295, E 22.046667

Contact: Vesna Dimitrijević

Pešturina is a karstic cave located in southeastern Serbia near the city of Niš, situated at an altitude of 330 m on the slopes of Suva Planina Mountain. The cave measures 22 m in depth, with a 15 m-wide and 3.5 m-high entrance (Mihailović and Milošević 2012; Mihailović 2014). Archaeological excavations began in 2006 and continue, with interruptions, to this day. The area of over 24 sq. m was excavated and a depth of c. 3 m has been reached. Five stratigraphic layers have been distinguished: the uppermost (layer 1) belongs to the Holocene, while layers 2-5 are attributed to the Upper Pleistocene.

The Pleistocene faunal assemblage from Pešturina Cave includes mammals, birds, reptiles, and amphibians (Milošević 2020; Jovanović et al. 2020; Dimitrijević 2021). The great diversity of bone remains probably reflected varied accumulation processes, when primary agents were predators who dragged their prey into the cave through hunting or scavenging. The faunal remains from layer 4 are of particular significance, since Pešturina is the only site in the territory of Serbia with deposits dated to the earlier period of the last glacial and the preceding interglacial.

The wildcat remains were scarce in Pešturina. Only two postcranial bones were discovered. A single phalanx of wildcat was found in layer 2, and the third metatarsal, DNA analysed in this paper, in layer 3. Layer 3 was likely deposited during MIS 3.

**Vinča – Belo Brdo**

N 44.762, E 20.623

Contact:Jelena Bulatović

The site of Vinča – Belo Brdo is located in the modern village of Vinča, 14 km to the east of Belgrade downtown. It represents a key Neolithic settlement in the central Balkans, with a long sequence of occupation that reflects major cultural developments in the region (Tasić et al. 2016). The first permanent occupation of the site took place around5,700 cal BC. After this initial phase, occupation ceased until around5,300 cal BC, after which the site was continuously occupied until *ca.* 4,550 cal BC followed by the Early Eneolithic and Middle Bronze Age deposits (Tasić, Marić, Bronk Ramsey, et al. 2015; Tasić, Marić, Penezić, et al. 2015). Although the full extent of the settlement remains unknown due to erosion by the Danube, the preserved area of at least 10 ha makes it the largest known Neolithic tell-settlement in the Pannonian Plain (Filipović et al. 2018). The cultural deposit is 9-m thick. Excavations since 1998 have focused on the final Vinča occupation in Sector II, and revealed three, or possible four, Late Vinča culture structural horizons represented by burnt rectangular buildings, interspaced with a horizon of unburnt buildings, oriented along a north-west axis, composed of two to three rooms, and housing at least one kiln per structure, with some buildings containing several kilns (Tasić, Marić, Penezić, et al. 2015).

Faunal remains from the Late Neolithic layers have been extensively studied (e.g. (Bulatović 2018; Dimitrijević 2008; Gillis et al. 2020; Gillis et al. 2021; Greenfield 2014) revealing that domestic animals played a dominant role in subsistence, though wild species were also exploited for meat and raw materials such as bone, antler, and skins (Bulatović 2018). Four wildcat remains were found at Vinča Belo Brdo from the Late Neolithic period (Bulatović 2018; Greenfield 2014). No traces of butchery were detected on these remains. Complete right humerus (BB 06/129/25) analysed in this study was excavated at unit 970, during 2006 excavation season. The unit 970 is as a cultural layer from the last phase of the Vinča culture – Vinča D2. Both epiphyses of the humerus are fused, indicating that the specimen belonged to an adult individual.

# **SUPPLEMENTARY FIGURES**

**Supplementary Fig. 1**

Supplementary Fig.1 Authentication of ancient DNA confirmed by increased misincorporation patterns at the ends of DNA molecules characteristic for single-stranded DNA libraries and read length distribution.

**Supplementary Figure 2.**


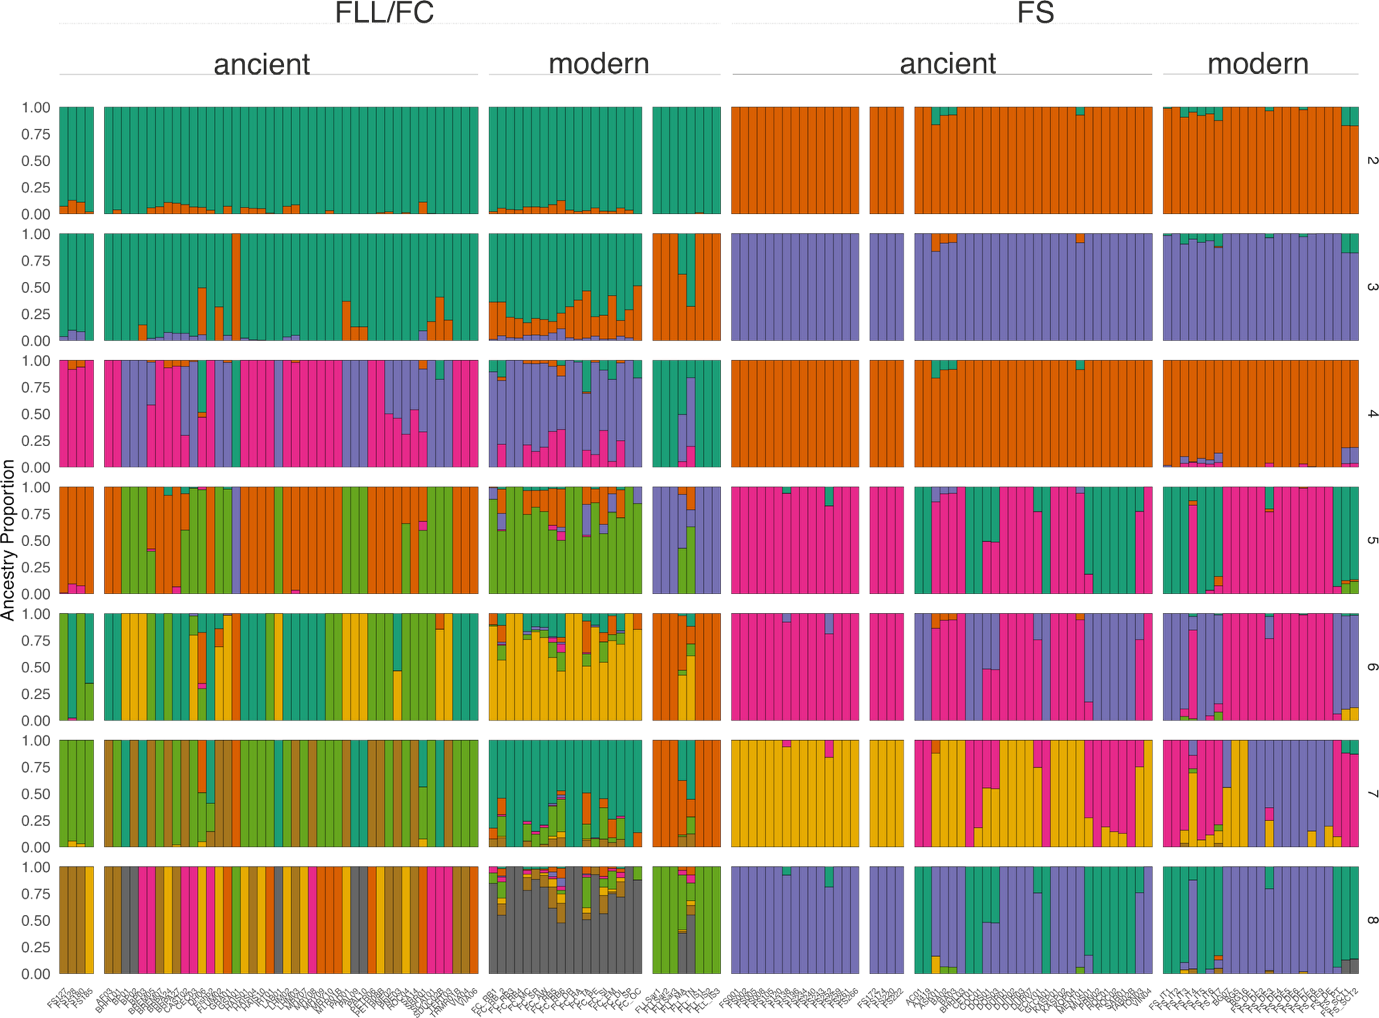


Supplementary Fig. 2 Admixture analyses performed on ancient and modern genomes. Unsupervised ADMIXTURE clustering for K values from 2 to 8 using specimens which were classified as FLL/FC or FS. Each bar represents one specimen, and the colours correspond to different clusters.

**Supplementary Figure 3.**


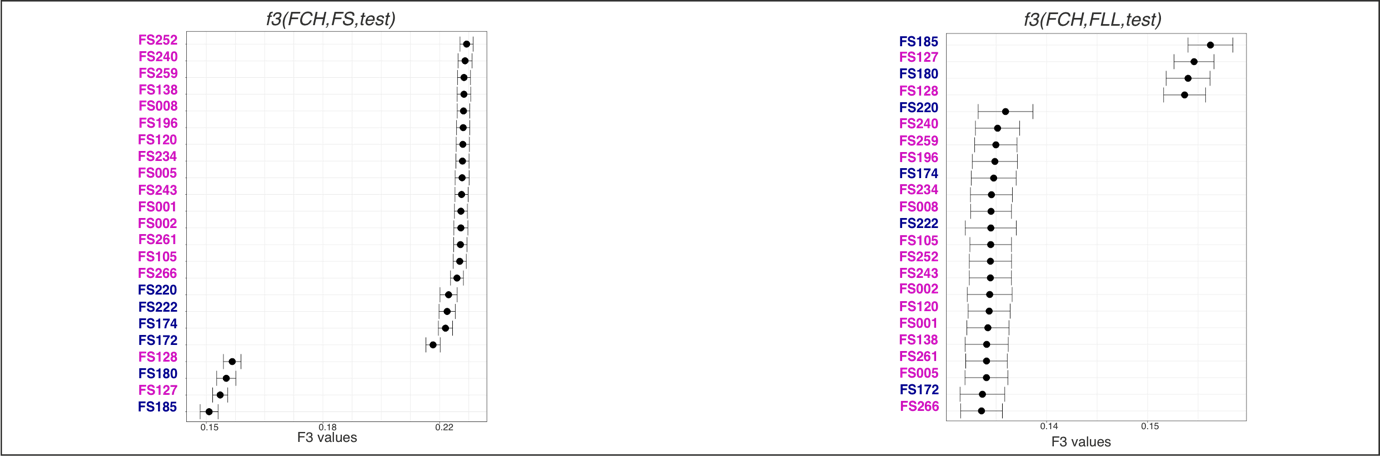


Supplementary Fig. 3 *f3*-outgroup statistics testing affinity to European wildcat (*F. silvestris*, FSS) or African wildcat from Tunisia (*F. l. lybica*; FLL). Samples from this study were colour-labelled: Poland (PL) - magenta, Serbia (RS) - navy blue.

**Supplementary Figure 4.**

Supplementary Fig. 4 Bayesian phylogeny of mitogenomes obtained in this study and modern specimens. The tree was calibrated using radiocarbon-dated specimens. The name of specimens included country (PL- Poland, RS - Serbia) and the median calibrated date. Posterior probability higher than 0.95 is marked by circles at nodes.

REFERENCES:

Baron, Henriette, Anna Elena Reuter, and Nemanja Marković. 2019. 'Rethinking ruralization in terms of resilience: Subsistence strategies in sixth-century Caričin Grad in the light of plant and animal bone finds', *Quaternary International*, 499: 112-28.

Borić, D. 2011. 'Adaptations and transformations of the Danube Gorges foragers (c. 13,000-5500 BC): an overview.' in R. Krauß (ed.), *Beginnings – New Research in the Appearance of the Neolithic between Northwest Anatolia and the Carpathian Basin* (Rahden: Verlag Marie Leidorf Gmbh).

Bulatović, A., and D. Milanović. 2020. *Bubanj, the Eneolithic and the Early Bronze Age tell in southeastern Serbia* (Vienna: Austrian Academy of Science Press).

Bulatović, A., and D. Milanović. 2012. 'Preliminarni rezultati arheoloških iskopavanja na lokalitetu Bubanj u Novom Selu u 2011. godini.' in V. Bikić, S. Golubović and D. Antonović (eds.), *Arheologija u Srbiji: projekti Arheološkog instituta u 2011. godini*

———. 2014. 'Arheološka istraživanja na lokalitetu Bubanj kod Novog Sela u 2012. godini.' in V. Bikić, S. Golubović and D. Antonović (eds.), *Arheologija u Srbiji: projekti Arheološkog instituta u 2011. godini*

Bulatović, J. 2018. 'Arheozoološki aspekti društvenih i kulturnih promena na centralnom Balkanu u petom milenijumu pre nove ere ', University of Belgrade.

———. 2020. 'Preliminary report on animal bones from Bubanj.' in A. Bulatović and D. Milanović (eds.), *Bubanj, the Eneolithic and the Early Bronze Age tell in southeastern Serbia* (Mitteilungen der Prähistorischen Kommission).

Chudziak, W., P. Błędowski, J. Bojarski, R. Kaźmierczak, and M. Weinkauf. 2016. 'Kontekst archeologiczno-historyczny.' in W. Chudziak and A. M. Noryśkiewicz (eds.), *Wczesnośredniowieczny zespół osadniczy w Kałdusie, Studia archeologiczno-paleobotaniczne. Mons Sancti Laurenti 8.* (Wydawnictwo Naukowe Uniwersytetu Mikołaja Kopernika: Toruń).

Chudziak, W., and R. Kaźmierczak. 2014. 'Chronology.' in Chudziak W. and Kaźmierczak R. (eds.), *The Island in Żólte on Lake Zarańskie. Early Medieval Gatrway into West Pomerania* (Institute of Archaeology Nicolaus Copernicus University: Toruń).

Clason, A. T. 1980. 'Padina and Starčevo: game, fish and cattle', *Palaeohistoria*, 22: 141–73.

Cyrek, K., A. Nadachowski, T. Madeyska, Z. Bocheński, T. Tomek, P. Wojtal, B. Miękina, G. Lipecki, A. Garapich, B. Rzebik-Kowalska, E. Stworzewicz, M. Wolsan, J. Godawa, R. Kościów, L. Fostowicz-Frelik, and Z. Szyndlar. 2020. 'Excavation in the Deszczowa Cave (Kroczyckie Rocks, Częstochowa Upland, Central Poland)', *Folia Quaternaria* 71: 5-84.

Czerniak R., Fudali T., and Gregorczyk G. 2024. 'Badania wykopaliskowe na obwodnicy Kazimierzy Wielkiej, woj. świętokrzyskie.' in M. Byrska-Fudali, Czerniak R. and Jarosz P. (eds.), *Archeologia na obwodnicy Kazimierzy Wielkiej: od śladów wczesnych rolników po starszą epokę brązu w dolinie Nidzicy* (Stowarzyszenie Archeologów Terenowych „Stater”; Wydawnictwo Profil-Archeo: Kraków).

Dimitrijević, V. 2008. 'Vertebrate fauna of Vinča – Belo Brdo (excavation campaigns 1998–2003)', *Starinar 56*, 56: 245–69.

———. 2021. 'Key Addition to Faunal Sequence of Middle-Late Pleistocene of Serbia: Remains of Mammals, from the Deposits of the Cave Pešturina (Jelašnica, Eastern Serbia) (in Serbian, English summary)', *Posebna izdanja Srpske akademije nauka i umetnosti, Odeljenje za matematiku, fiziku i geo-nauke, Zbornik Odbora za kras i speleologiju*, 11: 91-102.

Filipović, Dragana, Miroslav Marić, Dana Challinor, Jelena Bulatović, and Nenad Tasić. 2018. 'Natural environment and resources, and the long life of the Neolithic settlement at Vinča, southeast Europe', *Archaeological and Anthropological Sciences*, 11: 1939-60.

Gillis, R., J. Bulatović, K. Penezić, M. Spasić, N. Tasić, and C. Makarewicz. 2020. 'Herding and hunting at Vinča – Belo Brdo and Stubline during the Late Neolithic, a stable isotopic perspective.' in H. Greenfield (ed.), *Animal Secondary Products. Domestic Animal Exploitation in Prehistoric Europe, the Near East and the Far East* (Oxford: Oxbow books).

Gillis, R. E., J. Bulatovic, K. Penezic, M. Spasic, N. N. Tasic, and C. A. Makarewicz. 2021. 'Of herds and societies-Seasonal aspects of Vinca culture herding and land use practices revealed using sequential stable isotope analysis of animal teeth', *PLoS ONE*, 16: e0258230.

Greenfield, H. 2014. 'The origins of secondary product exploitation and the zooarchaeology of the Late Neolithic, Eneolithic, and Middle Bronze Age at Vinča – Belo Brdo, Serbia: the 1982 excavations.' in H. Greenfield (ed.), *Animal Secondary Products. Domestic Animal Exploitation in Prehistoric Europe, the Near East and the Far East* (Oxford: Oxbow books).

Ivanišević, V. 2016. "Caričin Grad (Justiniana Prima): a new-discovered city for a ‘new’ society”." In *Proceedings of the 23rd International Congress of Byzantine Studies*, edited by S. Marjanović-Dušanić, 107-26. Belgrade: Institute for Byzantine Studies.

Jarosz, P. 2024. 'Na przełomie epok. Kultura pucharów dzwonowatych i mierzanowicka na stanowiskach 3, 5 i 13 w Kazimierzy Wielkiej, woj. świętokrzyskie.' in M. Byrska-Fudali, Czerniak R. and P. Jarosz (eds.), *Archeologia na obwodnicy Kazimierzy Wielkiej: od śladów wczesnych rolników po starszą epokę brązu w dolinie Nidzicy* (Stowarzyszenie Archeologów Terenowych „Stater”; Wydawnictwo Profil-Archeo: Kraków).

Jovanović, B. 1969. 'Chronological frames of the Iron Gate group of the early Neolithic period', *Archaeologia Iugoslavica* X: 23-47.

———. 2008. 'Micro-regions of the Lepenski Vir culture: Padina in the Upper Gorge and Hajdučka Vodenica in the Lower Gorge of the Danube', *Documenta Praehistorica*, XXXV: 289-324.

Jovanović, Mihailo, Josep Francesc Bisbal-Chinesta, Dragana Đurić, Katarina Bogićević, Draženko Nenadić, Jordi Agustí, and Hugues-Alexandre Blain. 2020. 'Pleistocene herpetofaunal studies in Serbia (Balkan Peninsula, SE Europe): State of the art and perspectives', *Quaternary Science Reviews*, 233.

Kondić, V., and V. Popović. 1977. *Caričin Grad, a fortified city in Byzantine Illyricum* (Serbian Academy of Sciences and Arts Belgrade).

Kowalski K., Kozłowski J.K., and Madeyska T. 1972. 'Notes on chronology and paleoecology', *Folia Quaternaria*, 41: 133-41.

Krajcarz, M., D. Makowiecki, M. T. Krajcarz, A. Masłowska, M. Baca, H. Panagiotopoulou, A. Romańska, J. Bednarczyk, A. Gręzak, and M. Sudoł. 2016. 'On the Trail of the Oldest Domestic Cat in Poland. An Insight from Morphometry, Ancient DNA and Radiocarbon Dating', *International Journal of Osteoarchaeology*, 26: 912-19.

Krajcarz, M. T., M. Szymanek, M. Krajcarz, A. Pereswiet-Soltan, W. P. Alexandrowicz, and M. Sudol-Procyk. 2020. 'Shelter in Smolen III - A unique example of stratified Holocene clastic cave sediments in Central Europe, a lithostratigraphic stratotype and a record of regional paleoecology', *PLoS ONE*, 15: e0228546.

Krajcarz, Maciej T., Mateusz Baca, Chris Baumann, Herve Bocherens, Tomasz Goslar, Danijela Popović, Magdalena Sudoł-Procyk, and Magdalena Krajcarz. 2023. 'New Insights Into Late Pleistocene Cave Hyena Chronology and Population HISTORY—THE Case of Perspektywiczna Cave, Poland', *Radiocarbon*, 65: 1038-56.

Krajcarz, Maciej T., Magdalena Krajcarz, Tomasz Goslar, and Adam Nadachowski. 2015. 'The first radiocarbon dated steppe polecat (Mustela eversmanii) from the Pleistocene of Poland', *Quaternary International*, 357: 237-44.

Krajcarz, Magdalena, Maciej T. Krajcarz, Mateusz Baca, Chris Baumann, Wim Van Neer, Danijela Popovi, Magdalena Sudoł-Procyk, Bartosz Wach, Jarosław Wilczynski, Michał Wojenka, and Hervé Bocherens. 2020. 'Ancestors of domestic cats in Neolithic Central Europe: Isotopic evidence of a synanthropic diet', *Proceedings of the National Academy of Sciences*, 117: 17710-19.

Krajcarz, Magdalena, Martina Pacher, Maciej T. Krajcarz, Lana Laughlan, Gernot Rabeder, Martin Sabol, Piotr Wojtal, and Hervé Bocherens. 2016. 'Isotopic variability of cave bears (δ15N, δ13C) across Europe during MIS 3', *Quaternary Science Reviews*, 131: 51-72.

Makowiecki, D., Makowiecka M., and M. Wiejacka. 2020. 'Kości zwierzęce.' in M. Wiewióra (ed.), *Castra Terrae Culmensis, na rubieży chrześcijańskiego świata. Interdyscyplinarne badania nad warownym budownictwem zakonu krzyżackiego w świetle źródeł archeologiczno-architektonicznych, historycznych i przyrodniczych* (Uniwersytet Mikołaja Kopernika: Toruń).

Makowiecki, Daniel, and Marzena Makowiecka. 2014. 'Faunal remains.' in Chudziak W. and Kaźmierczyk R. (eds.), *The Island in Żólte on Lake Zarańskie. Early Medieval Gateway into West Pomerania* (Institute of Archaeology Nicolaus Copernicus University: Toruń).

Marciszak, A., W. Gornig, L. Matyaszczyk, K. Demidziuk, and M. Kasprzak. 2024. 'Remains of Canidae and Felidae from Południowa Cave (Sudety Mts, Silesia, SW Poland)', *Geological Quarterly* 68 23.

Marciszak, A., W. Gornig, and K. Stefaniak. 2017. 'Large mammals (carnivores, artiodactyls) from Solna Jama Cave (Bystrzyckie Mts, Southwestern Poland) in the context of faunal changes in the postglacial period of Central Europe', *Palaeontologia Electronica*, 20: 1-37.

Marković, N., and H. Baron. 2022. 'Wildlife as Landscape Proxy for Early Byzantine Caričin Grad (Justiniana Prima).' in A. Cristilli, F. De Luca, G. Di Luca and A. Gonfloni (eds.), *Experiencing the Landscape in Antiquity 2* (BAR International Series 3107: Oxford).

Marković, N., A. Reuter, and J. Birk. 2019. 'Bioarchaeological research of everyday life in the Caričin Grad (Justiniana Prima) (in Serbian)', *Leskovački zbornik* 59: 21-44.

Mihailović, D. 2014. *Paleolit Na Centralnom Balkanu - Kulturne promene i populaciona kretanja* (Srpsko arheološko društvo: Beograd).

Mihailović, D., and S. Milošević. 2012. 'Istraživanja paleolitskog nalazišta Pešturina kod Niša', *Glasnik Srpskog arheološkog društva*, 28: 87-106.

Milošević, S. 2020. *Competition Between Humans and Large Carnivores: Case Studies from the Late Middle and Upper Palaeolithic of the Central Balkans* (BAR International Series: Oxford).

Mladenović, Mladen, and Stefan Pop-Lazić. 2023. 'Animal management in the fortified palace Felix Romuliana – Gamzigrad (Serbia) throughout the Late Antique and the Early Byzantine periods', *Journal of Archaeological Science: Reports*, 49.

Moskal-del Hoyo, M., A. Mueller-Bieniek, W. P. Alexandrowicz, J. Wilczyński, S. Wędzicha, M. Kapcia, and M. M. Przybyła. 2017. 'The continuous persistence of open oak forests in the Miechów Upland (Poland) in the second half of the Holocene.', *Quaternary International*, 458: 14-27.

Petković, S. 2010. 'Rimski Gamzigrad pre carske palate.' in I. Popović (ed.), *Felix Romuliana – Gamzigrad* (Arheološki Institut: Belgrade).

Sudoł, M., E. Bokiniec, M. Krajcarz, M.T. Krajcarz, A. Trojan, and O. Grafka. 2015. 'Human activity traces from shelter in Smoleń III (central part of Kraków – Częstochowa Upland) from the last centuries of antiquity', *Przegląd Archeologiczny*, 63: 177-93.

Sudoł, M., K. Cyrek, M. Krajcarz, and M.T. Krajcarz. 2016. 'Around the Biśnik Cave – the area of human penetration during Palaeolithic', *Anthropologie (1962-),*, 54: 49-68.

Tasić, N. 1979. 'Bubanj-Sălcuţa-Krivodol kompleks.' in A. Benac (ed.), *Praistorija jugoslavenskih zemalja III* (Akademija nauka i umjetnosti Bosne i Hercegovine, Centar za balkanološka ispitivanja).

Tasić, N., M. Marić, C. Bronk Ramsey, B. Kromer, A. Barclay, A. Bayliss, N. Beavan, B. Gaydarska, and A. Whittle. 2015. 'Vinča – Belo Brdo, Serbia: the times of a tell', *Germania*, 93: 1-76.

Tasić, N., M. Marić, D. Filipović, K. Penezić, E. Dunbar, P. Reimer, A. Barclay, A. Bayliss, B. Gaydarska, and A. Whittle. 2016. 'Interwoven strands for refining the chronology of the Neolithic tell of Vinča – Belo Brdo, Serbia', *Radiocarbon*, 58: 795-831.

Tasić, N., M. Marić, K. Penezić, D. Filipović, K. Borojević, N. Russell, P. Reimer, A. Barclay, A. Bayliss, D. Borić, B. Gaydarska, and A. Whittle. 2015. 'The end of the affair: formal chronological modelling for the top of the Neolithic tell of Vinča – Belo Brdo', *Antiquity*, 89: 1064-82.

Trajković-Filipović, T., D. Milanović, and A. Bulatović. 2008. 'Reviziona arheološka iskopavanja lokaliteta Bubanj kod Niša u 2008. godini.' in, *Zbornik Narodnog muzeja u Nišu*

Wasik, B. 2020. 'Pierwsza lokacja Chełmna.' in M. Wiewióra (ed.), *Castra Terrae Culmensis, na rubieży chrześcijańskiego świata. Interdyscyplinarne badania nad warownym budownictwem zakonu krzyżackiego w świetle źródeł archeologiczno-architektonicznych, historycznych i przyrodniczych* (Uniwersytet Mikołaja Kopernika: Toruń).

Wilczyński J., Pospuła S., and Wertz K. 2024. 'Szczątki zwierzęce ze stanowisk Kazimierza Wielka 3, 5 i 13, woj. świętokrzyskie – wyniki analizy archeozoologicznej ' in M. Byrska-Fudali, Czerniak R. and P. Jarosz (eds.), *Archeologia na obwodnicy Kazimierzy Wielkiej: od śladów wczesnych rolników po starszą epokę brązu w dolinie Nidzicy* (Stowarzyszenie Archeologów Terenowych „Stater”; Wydawnictwo Profil-Archeo: Kraków).

Wilczynski, J., M. T. Krajcarz, M. Moskal-del Hoyo, W. P. Alexandrowicz, B. Miekina, A. Pereswiet-Soltan, Wertz K., Lipecki G., Marciszak A., Lõugas L., Gradziński M., Szczepanek A., Zastawny A., and M. Wojenka. 2020. 'Late Glacial and Holocene paleoecology and paleoenvironmental changes in the northern Carpathians foreland: The Zarska Cave (southern Poland) case study.', *Holocene*, 30: 905-22.

Wojenka M., Wilczyński J., and Zastawny A. 2016. 'Archaeological excavations in Żarska Cave in Żary, Kraków district, 2012–2015: an interim report', *Recherches Archéologiques* NS 8: 185-204.

Živaljević, I. 2017. 'Ribolov na Đerdapu u ranom holocenu (10. – 6. milenijum pre n. e.)', University of Belgrade.

Živić, M. 2011. 'Gamzigrad: Name, position and economic potential.' in I. Popović (ed.), *Felix Romuliana – Gamzigrad* (Službeni glasnik: Belgrade).
